# Supplementary material for: Poly(aspartic acid) Biohydrogel as the Base of a New Hybrid Conducting Material
Source: MDPI journal article supplement (doi:10.3390/ijms222313165), 2021-12-06
Supplement: s1 [file s1]

# **Poly(Aspartic Acid) Biohydrogels as Hybrid Conducting Materials Based**

**Adrián Fontana-Escartín,<sup>1,2</sup> Guillem Ruano,<sup>1,2</sup> Fiorella M. Silva,<sup>1</sup>  
Francesc Estrany,<sup>1,2</sup> Jordi Puiggali,<sup>1,2</sup> Carlos Alemán,<sup>1,2</sup> and Juan  
Torras<sup>1,2,\*</sup>**

<sup>1</sup> *Departament d'Enginyeria Química, EEBE, Universitat Politècnica de Catalunya, C/ Eduard  
Maristany 10-14, Ed. I2, 08019 Barcelona, Spain*

<sup>2</sup> *Barcelona Research Center for Multiscale Science and Engineering, Universitat Politècnica  
de Catalunya, Eduard Maristany 10-14, 08019 Barcelona, Spain*

\* Corresponding author: joan.torras@upc.edu

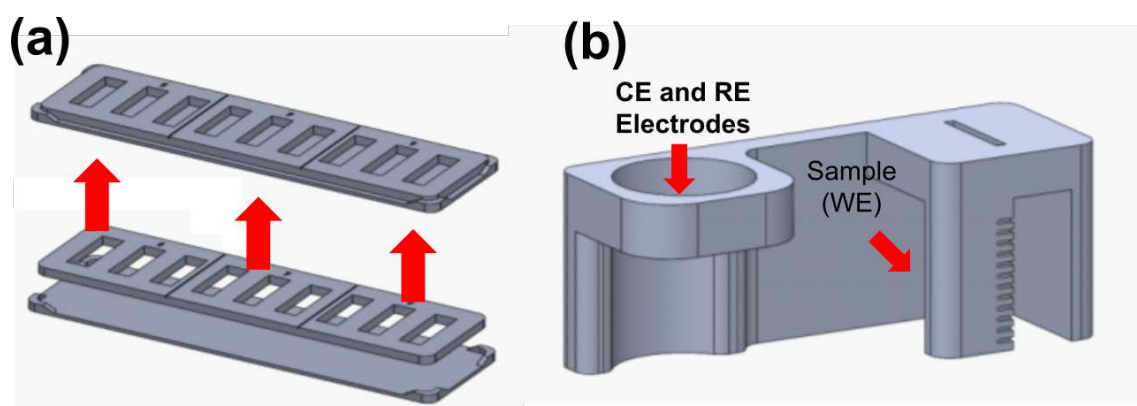

**Figure S1.** (a) Molds for the synthesis of the PASP and PASP/PEDOT hydrogels ; (b) Sample support device used in the electropolymerization of PHMeDOT and its electrochemical characterization.

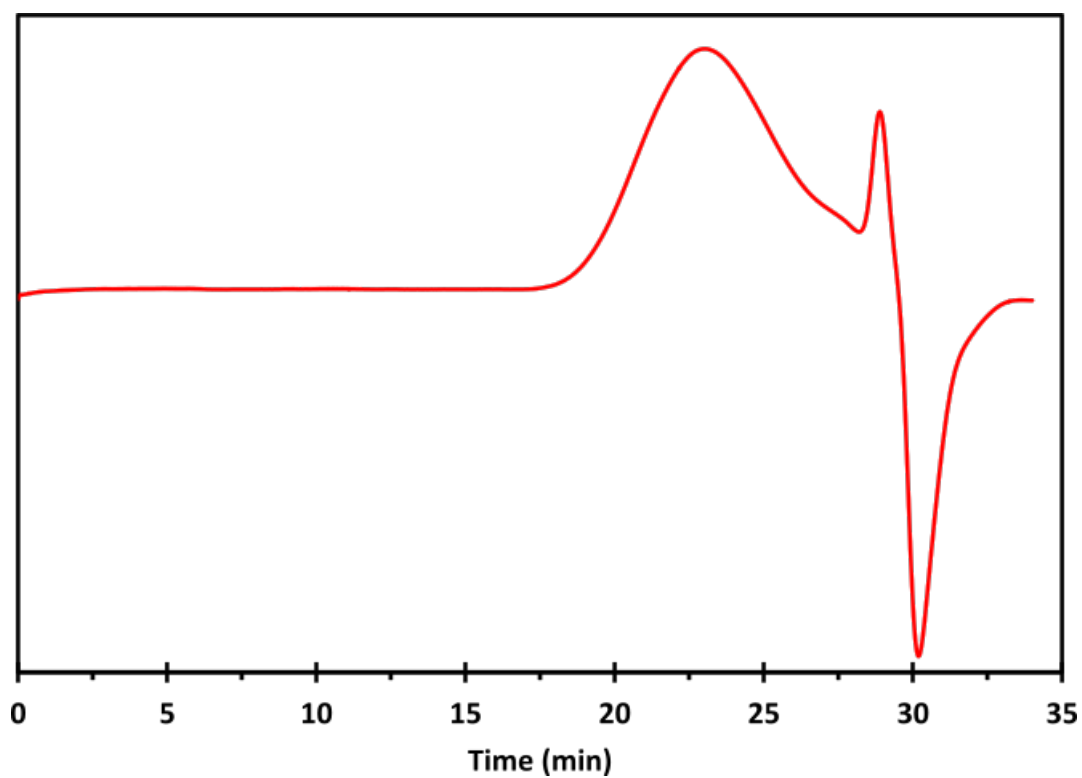

**Figure S2.** Elution diagram of PSI by gel permeation chromatography (GPC)

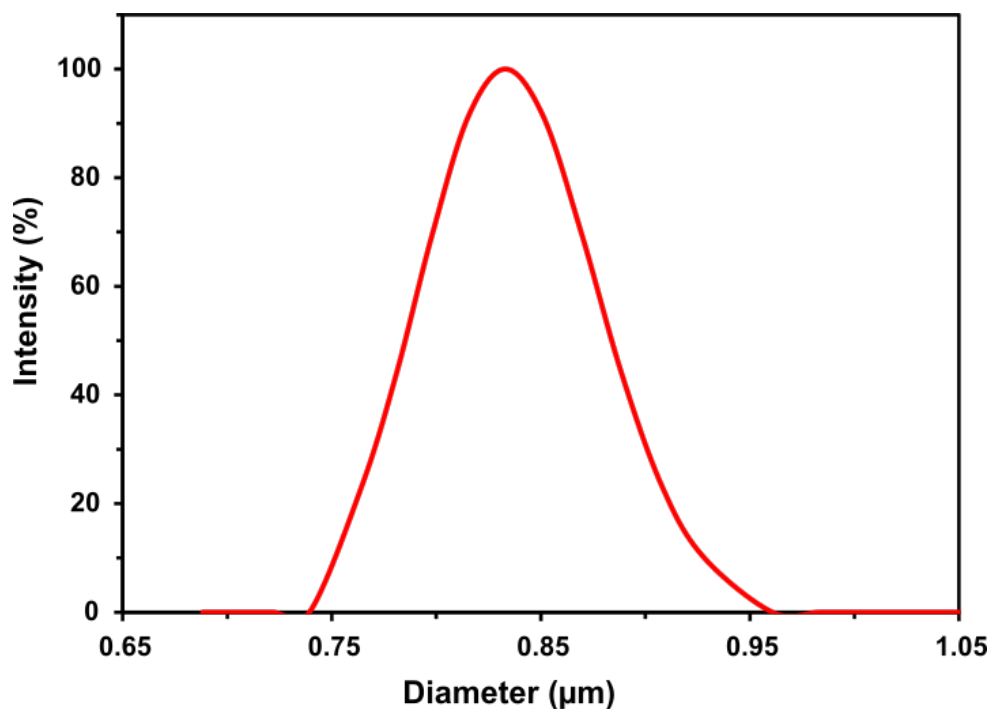

**Figure S3.** Dynamic light scattering (DLS) spectrum of synthesized PEDOT MPs.

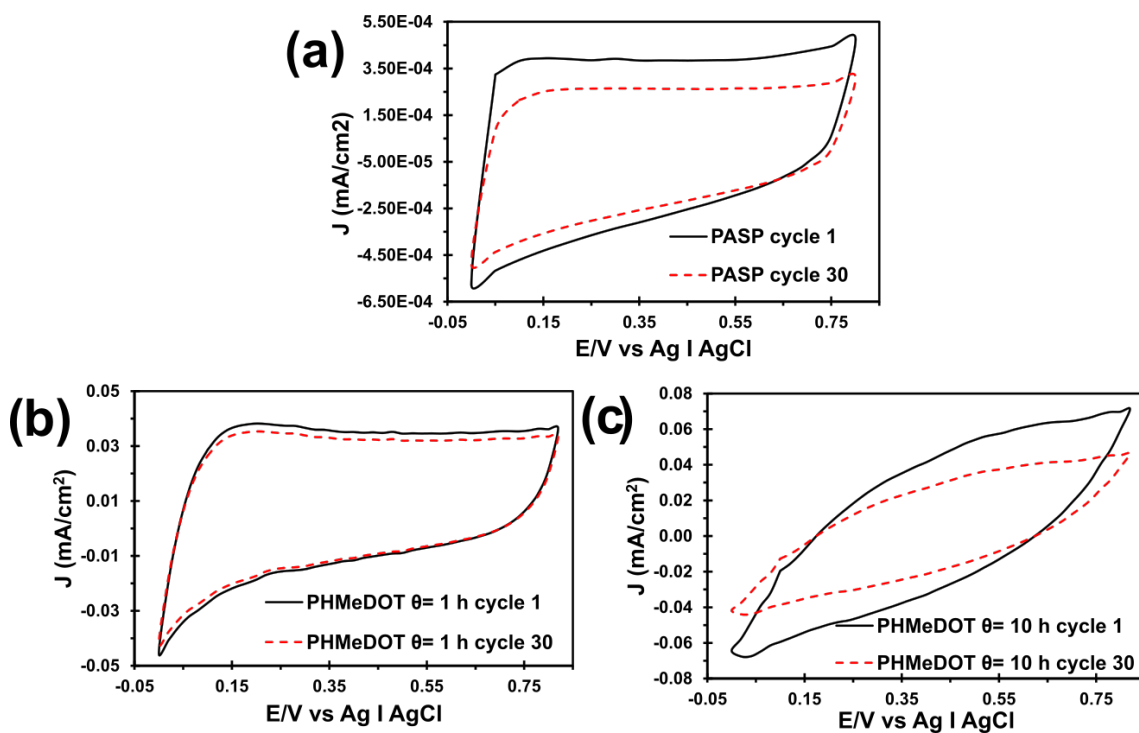

**Figure S4.** Voltammograms for (a) PASP Hydrogel; (b) [PASP/PEDOT] PHMeDOT ( $\theta = 1$ h); and (c) [PASP/PEDOT] PHMeDOT ( $\theta = 10$ h). Both the control voltammogram (first redox cycle) and the voltammogram after 30 consecutive redox cycles are shown.
